# Supplementary material for: Planning, implementing, and evaluating Hepatitis C virus elimination via collaborative community-based care cascade: age–period–cohort model for estimating demand from antecedent anti-HCV survey
Source: Hepatol Int. 2023 Nov 21;18(2):476–85. doi: 10.1007/s12072-023-10605-x (PMC11014808; doi:10.1007/s12072-023-10605-x)
Supplement: Supplementary file 1 — Supplementary file1 (DOCX 477 KB) [file 12072_2023_10605_MOESM1_ESM.docx]

**Supplementary Materials**

**sFigure 1. The Bayesian directed acyclic graphic (DAG) model for the age, period, and cohort effects on the HCV infection within township level, Changhua**


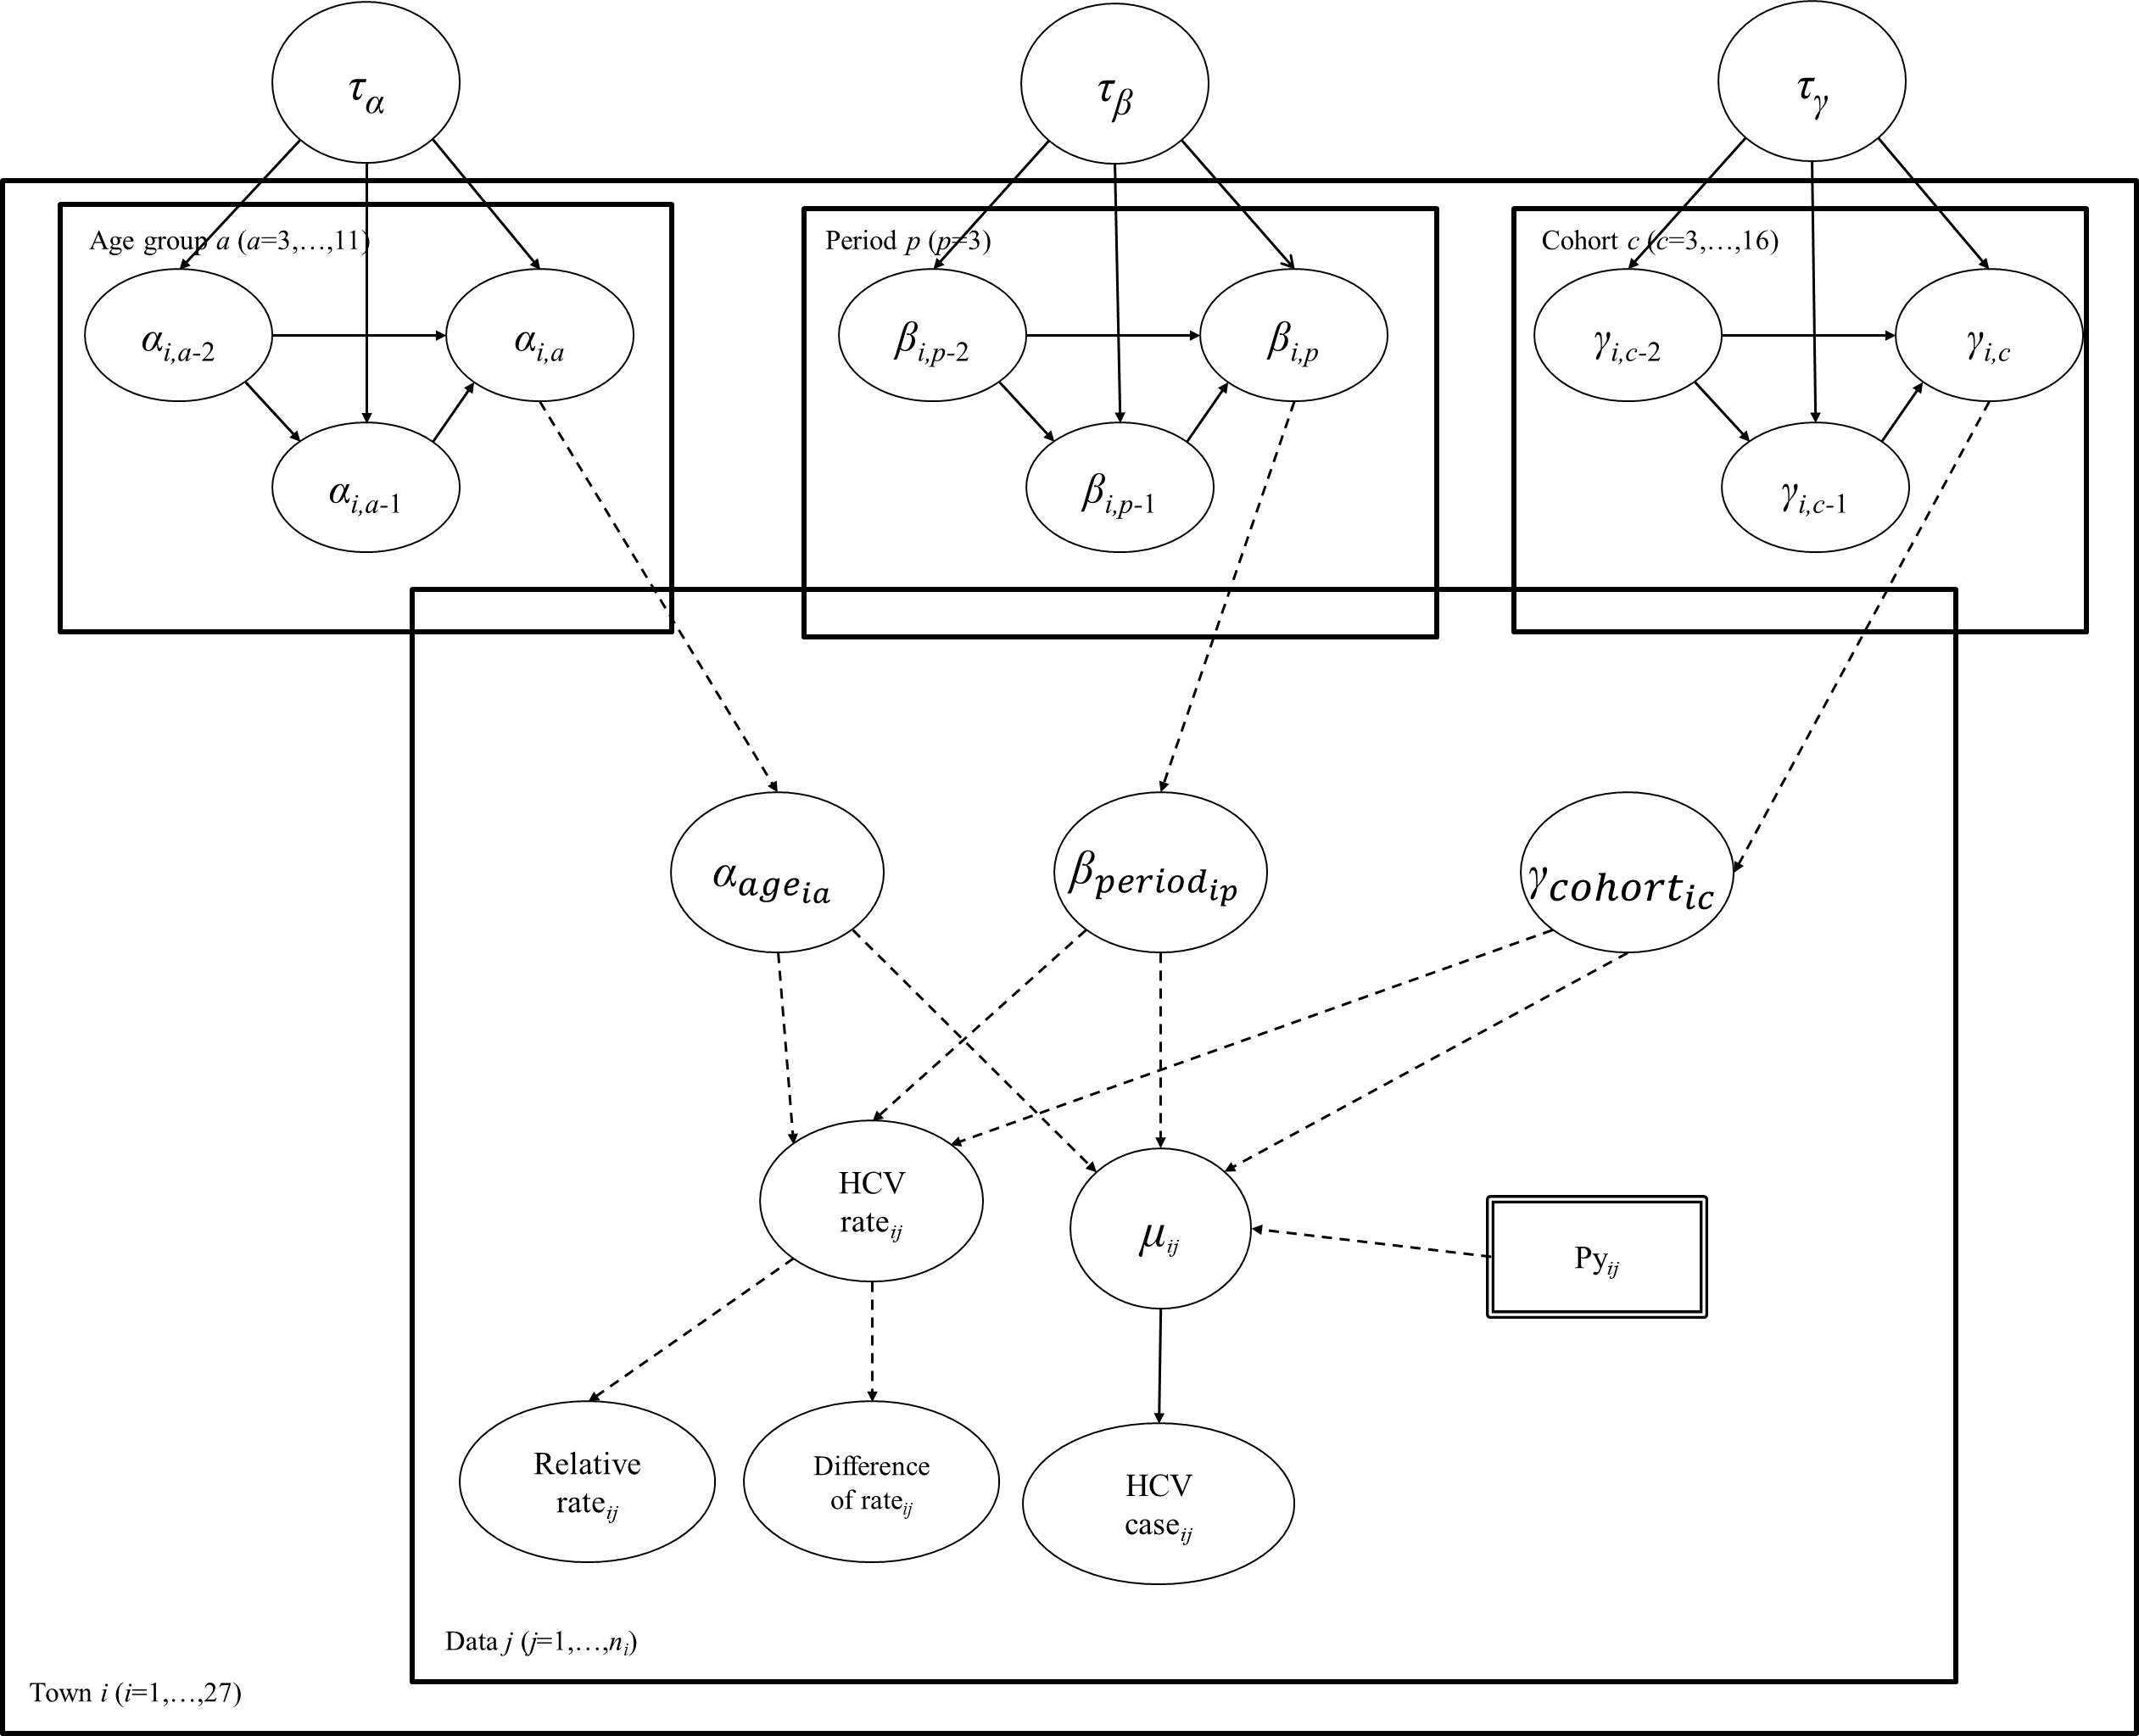


**The Bayesian age-period-cohort (APC) Poisson regression model with the directed acyclic graphic (DAG)**

This Bayesian DAG model regresses the counts of HCV cases (denoted by ) and the corresponding person years (denoted by ) on the three main independent variables, including age (), period () and cohort () as follows,

(1)

(2)

Where represent the age effect on the HCV infection with 11 age bands (denoted by a) across 27 townships (denoted by i), and represent the period (denoted by p) and cohort effects (denoted by c), respectively, across 27 townships.

For the specification of the prior distributions, the parameters of first term (and second term ( of age, period and cohort follow non-informative Normal distribution with high variance [Eq. (3) (5) and (7)] and informative normal distribution with mean following second-order autoregression function (eg. for age effect) are specified for the third and the further parameters. [Eq. (4) (6) and (8)]

(3)

(4)

(5)

(6)

(7)

(8)

The DAG model (sFigure 1) shows the parents-children relationship for the relevant variables and regression coefficients, for example, the observed counts of HCV cases () following Poisson distribution with mean determined by person years and incidence rate, and also a series of functions on age, period, and cohort effects, each of which is captured by the two previous terms, taking age as an example , , and precision (.

**sFigure 2. Age-cohort effect on prevalence of HCV infection by level**

1. **Prevalence < 2.5%**
2. **Prevalence 2.5-4.2%**
3. **Prevalence 4.2-5.9%**
4. **Prevalence >5.9%**

**sFigure 3. Geographic distribution of the estimated number of HCV infection with APC model by gender between 2015-2018**

1. **Male (B) Female**


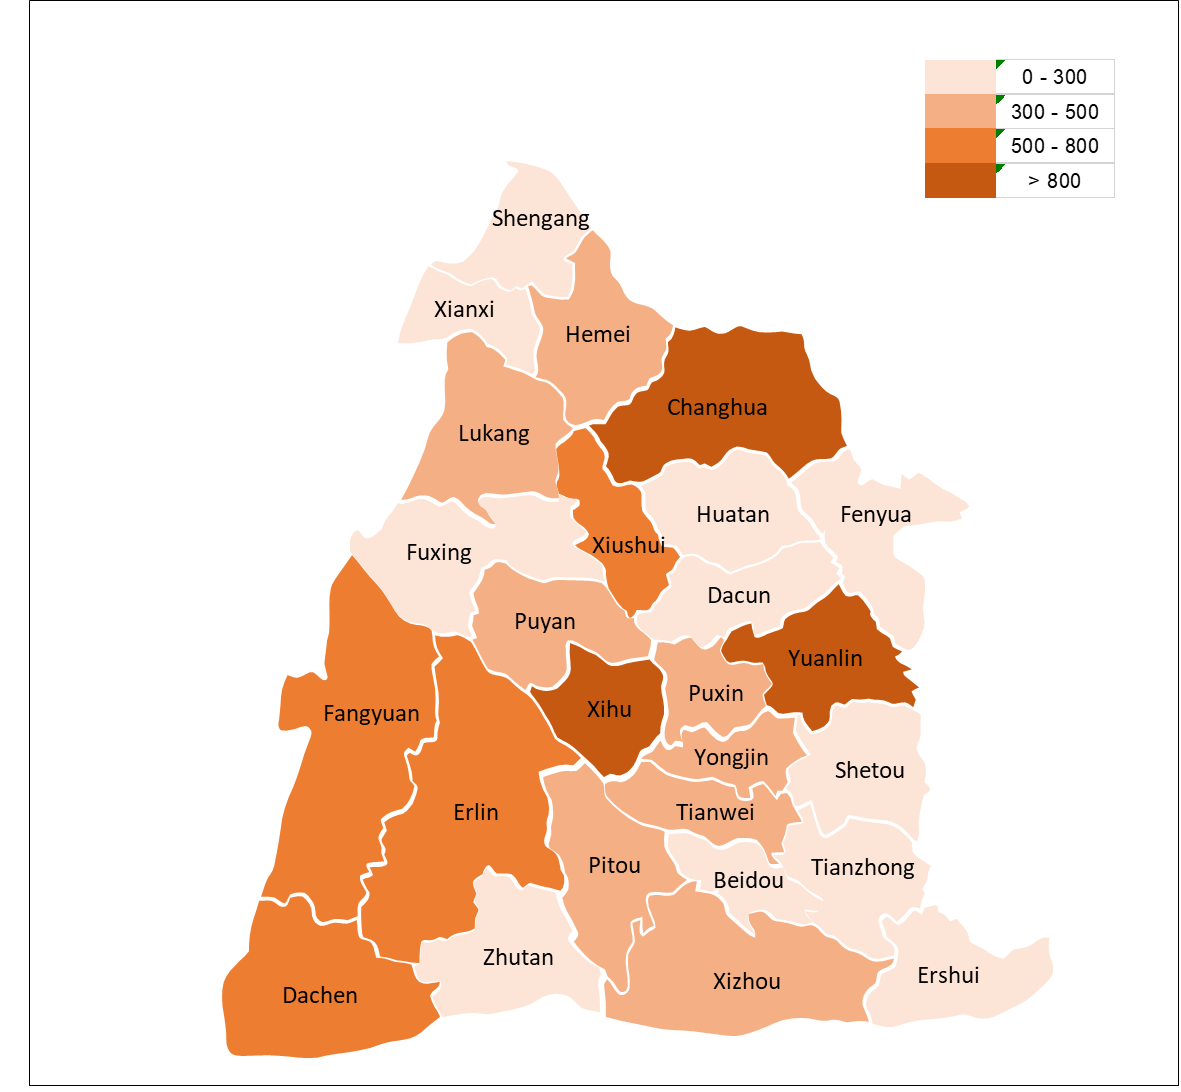

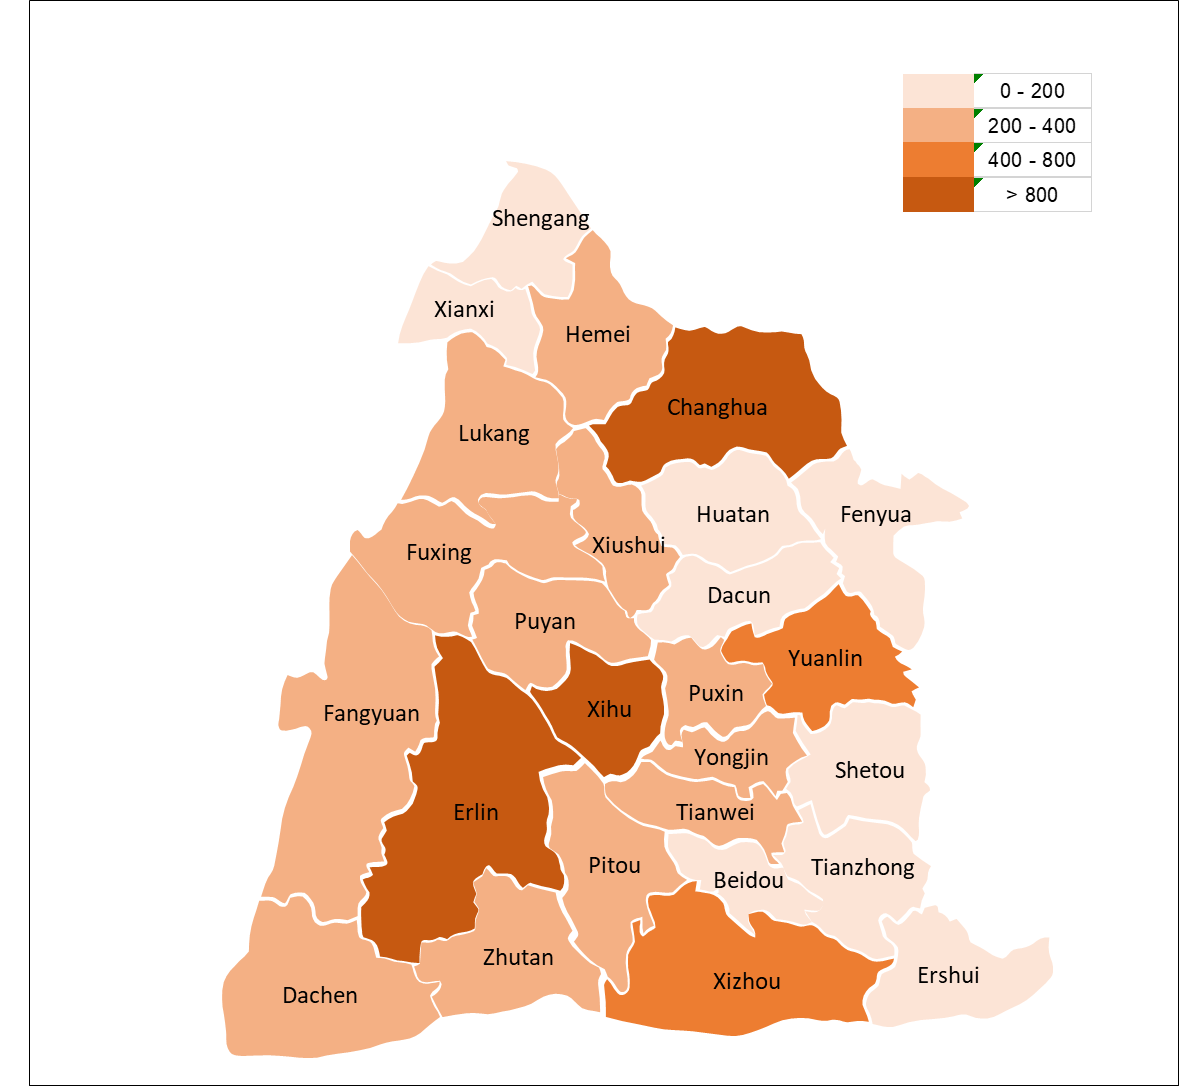


**sTable 1. Prevalence of HCV infection by age and gender in Changhua community**

| **Age group** | **Male** | | | **Female** | | | **Overall** | | |
| --- | --- | --- | --- | --- | --- | --- | --- | --- | --- |
| **Prevalent case** | **Screenee** | **Prevalence**  **(%)** | **Prevalent case** | **Screenee** | **Prevalence**  **(%)** | **Prevalent case** | **Screenee** | **Prevalence**  **(%)** |
| **30-49** | 277 | 12752 | 2.17 | 626 | 32762 | 1.91 | 903 | 45514 | 1.98 |
| **50-69** | 1264 | 27234 | 4.64 | 2338 | 42266 | 5.53 | 3602 | 69500 | 5.18 |
| **>=70** | 341 | 4069 | 8.38 | 442 | 4534 | 9.75 | 783 | 8603 | 9.10 |
| **Total** | 1882 | 44055 | 4.27 | 3406 | 79562 | 4.28 | 5288 | 123617 | 4.28 |

**sTable 2. Multivariable Analysis by Gender on Prevalence of HCV**

|  | | Male | | | Female | | |
| --- | --- | --- | --- | --- | --- | --- | --- |
| aRR | 95% CI | | aRR | 95% CI | |
| Age group |  |  |  |  |  |  |  |
| 30-49 | 2015-2018 | 0.74 | (0.34 | 1.40) | 1.08 | (0.60 | 1.81) |
| 2010-2014 | 0.85 | (0.59 | 1.17) | 1.02 | (0.77 | 1.33) |
| 2005-2009 | 1.00 |  |  | 1.00 |  |  |
| 50-69 | 2015-2018 | 0.65 | (0.43 | 0.93) | 0.82 | (0.60 | 1.11) |
| 2010-2014 | 0.79 | (0.64 | 0.96) | 0.89 | (0.75 | 1.05) |
| 2005-2009 | 1.00 |  |  | 1.00 |  |  |
| >=70 | 2015-2018 | 0.69 | (0.43 | 1.06) | 0.84 | (0.54 | 1.27) |
| 2010-2014 | 0.85 | (0.65 | 1.08) | 0.91 | (0.71 | 1.14) |
| 2005-2009 | 1.00 |  |  | 1.00 |  |  |

**sTable 3. Geographic distribution of number of HCV infection cases between 2015-2018**

| **County** | **Male** | | **Female** | |
| --- | --- | --- | --- | --- |
| **Observed** | **Estimated** | **Observed** | **Estimated** |
| Changhua City | 38 | 47.3 | 37 | 35.3 |
| Lukang | 20 | 19.6 | 23 | 18.9 |
| Hemei | 16 | 16.6 | 23 | 16.3 |
| Beidou | 8 | 9.5 | 9 | 8.2 |
| Yuanlin | 35 | 32.2 | 26 | 28.2 |
| Xihu | 52 | 56.1 | 33 | 40.3 |
| Tianzhong | 14 | 13.6 | 9 | 9.2 |
| Erlin | 17 | 18.6 | 22 | 19.4 |
| Xianxi | 12 | 9.5 | 8 | 7.1 |
| Shengang | 12 | 11.4 | 8 | 10.9 |
| Fuxing | 16 | 15.8 | 9 | 10.7 |
| Xiushui | 23 | 31.0 | 12 | 17.7 |
| Huatan | 9 | 10.1 | 8 | 10.0 |
| Fenyuan | 11 | 12.8 | 16 | 16.6 |
| Dacun | 12 | 16.6 | 13 | 12.5 |
| Puyan | 22 | 25.4 | 30 | 22.6 |
| Puxin | 20 | 21.8 | 18 | 15.9 |
| Yongjing | 25 | 24.4 | 12 | 20.1 |
| Shetou | 16 | 13.4 | 10 | 10.7 |
| Ershui | 9 | 7.2 | 6 | 4.7 |
| Tianwei | 29 | 22.4 | 20 | 17.2 |
| Pitou | 28 | 26.6 | 22 | 21.1 |
| Fangyuan | 32 | 28.8 | 17 | 16.0 |
| Dacheng | 40 | 45.0 | 48 | 43.3 |
| Zhutang | 16 | 20.1 | 15 | 16.4 |
| Xizhou | 10 | 13.2 | 29 | 24.0 |
| **Overall** | 542 | 569.0 | 483 | 473.3 |

**sTable 4. Geographic distribution of estimated number of HCV infection cases between 2019-2023 based on APC model**

1. **Overall**

| **County** | **Population** | **Projected HCV infection** | | |
| --- | --- | --- | --- | --- |
| **Total cases** | **Male** | **Female** |
| Changhua City | 151887 | 2299.4 | 987.4 | 1312.0 |
| Lukang | 55633 | 862.1 | 430.7 | 431.4 |
| Hemei | 59160 | 737.7 | 340.8 | 396.9 |
| Beidou | 21890 | 337.6 | 134.8 | 202.8 |
| Yuanlin | 80554 | 1730.7 | 936.9 | 793.8 |
| Xihu | 35269 | 2204.2 | 1127.8 | 1076.4 |
| Tianzhong | 28487 | 467.4 | 234.0 | 233.4 |
| Erlin | 34762 | 1508.0 | 586.4 | 921.6 |
| Xianxi | 11081 | 332.6 | 161.3 | 171.3 |
| Shengang | 23659 | 460.2 | 197.1 | 263.1 |
| Fuxing | 31012 | 645.1 | 272.4 | 372.7 |
| Xiushui | 25153 | 971.2 | 545.4 | 425.9 |
| Huatan | 30571 | 433.6 | 148.4 | 285.1 |
| Fenyuan | 16405 | 428.1 | 158.7 | 269.4 |
| Dacun | 24616 | 520.3 | 277.7 | 242.6 |
| Puyan | 22278 | 956.5 | 498.7 | 457.9 |
| Puxin | 23475 | 746.6 | 370.0 | 376.7 |
| Yongjing | 24986 | 822.6 | 442.1 | 380.5 |
| Shetou | 28695 | 491.6 | 242.3 | 249.3 |
| Ershui | 11213 | 243.2 | 149.5 | 93.7 |
| Tianwei | 18306 | 774.3 | 405.1 | 369.3 |
| Pitou | 20689 | 906.2 | 440.3 | 466.0 |
| Fangyuan | 24164 | 1047.3 | 587.7 | 459.6 |
| Dacheng | 12670 | 983.2 | 520.0 | 463.2 |
| Zhutang | 10729 | 625.7 | 289.2 | 336.6 |
| Xizhou | 20861 | 826.7 | 301.1 | 525.6 |
| **Overall** | 848205 | 22362.1 | 10785.5 | 11576.6 |

1. **30-49 years-old**

| **County** | **Population** | **Projected HCV infection** | | |
| --- | --- | --- | --- | --- |
| **Total cases** | **Male** | **Female** |
| Changhua City | 71314 | 649.2 | 242.9 | 406.4 |
| Lukang | 26996 | 178.0 | 118.9 | 59.2 |
| Hemei | 29297 | 167.2 | 70.0 | 97.1 |
| Beidou | 9964 | 66.8 | 25.6 | 41.2 |
| Yuanlin | 37665 | 443.5 | 289.3 | 154.2 |
| Xihu | 16549 | 410.7 | 245.8 | 164.9 |
| Tianzhong | 12115 | 109.3 | 71.3 | 38.0 |
| Erlin | 14813 | 202.2 | 84.3 | 117.8 |
| Xianxi | 5188 | 66.1 | 41.5 | 24.7 |
| Shengang | 11802 | 128.6 | 51.0 | 77.6 |
| Fuxing | 14400 | 116.6 | 48.3 | 68.4 |
| Xiushui | 11864 | 152.7 | 113.9 | 38.8 |
| Huatan | 14537 | 113.6 | 42.0 | 71.5 |
| Fenyuan | 6939 | 78.3 | 30.7 | 47.6 |
| Dacun | 11574 | 128.3 | 85.6 | 42.7 |
| Puyan | 9829 | 245.8 | 142.3 | 103.5 |
| Puxin | 11099 | 130.6 | 75.0 | 55.6 |
| Yongjing | 11348 | 201.9 | 160.3 | 41.6 |
| Shetou | 12905 | 131.0 | 75.0 | 56.0 |
| Ershui | 4268 | 77.9 | 51.9 | 26.0 |
| Tianwei | 8061 | 172.2 | 106.1 | 66.1 |
| Pitou | 8997 | 73.2 | 42.5 | 30.7 |
| Fangyuan | 10083 | 154.0 | 81.0 | 73.0 |
| Dacheng | 5059 | 123.9 | 89.0 | 34.9 |
| Zhutang | 4199 | 70.5 | 41.8 | 28.8 |
| Xizhou | 8780 | 166.2 | 78.5 | 87.7 |
| **Overall** | 389645 | 4558.2 | 2504.4 | 2053.8 |

1. **50-69 years-old**

| **County** | **Population** | **Projected HCV infection** | | |
| --- | --- | --- | --- | --- |
| **Total cases** | **Male** | **Female** |
| Changhua City | 60376 | 1302.6 | 586.3 | 716.3 |
| Lukang | 21018 | 418.0 | 217.0 | 201.0 |
| Hemei | 23051 | 378.5 | 147.4 | 231.1 |
| Beidou | 8654 | 183.1 | 83.1 | 100.0 |
| Yuanlin | 32352 | 832.0 | 422.3 | 409.6 |
| Xihu | 13749 | 1138.1 | 546.3 | 591.7 |
| Tianzhong | 11444 | 229.3 | 128.6 | 100.7 |
| Erlin | 13333 | 610.2 | 273.7 | 336.5 |
| Xianxi | 4380 | 141.2 | 83.8 | 57.4 |
| Shengang | 8862 | 218.6 | 104.0 | 114.6 |
| Fuxing | 12028 | 346.2 | 183.4 | 162.9 |
| Xiushui | 9975 | 507.5 | 304.0 | 203.6 |
| Huatan | 12180 | 253.8 | 83.2 | 170.6 |
| Fenyuan | 6560 | 190.5 | 81.4 | 109.1 |
| Dacun | 9873 | 289.5 | 143.5 | 146.0 |
| Puyan | 8387 | 422.5 | 219.8 | 202.7 |
| Puxin | 9215 | 368.7 | 193.2 | 175.4 |
| Yongjing | 9915 | 390.9 | 204.1 | 186.8 |
| Shetou | 11542 | 266.8 | 138.4 | 128.4 |
| Ershui | 4531 | 103.4 | 61.7 | 41.7 |
| Tianwei | 7168 | 401.0 | 206.8 | 194.2 |
| Pitou | 8003 | 428.3 | 232.7 | 195.6 |
| Fangyuan | 8831 | 445.4 | 244.4 | 201.1 |
| Dacheng | 4553 | 387.5 | 228.0 | 159.4 |
| Zhutang | 4161 | 288.3 | 139.6 | 148.7 |
| Xizhou | 8070 | 348.4 | 141.0 | 207.4 |
| **Overall** | 332211 | 10890.1 | 5397.7 | 5492.4 |

1. **>=70 years-old**

| **County** | **Population** | **Projected HCV infection** | | |
| --- | --- | --- | --- | --- |
| **Total cases** | **Male** | **Female** |
| Changhua City | 20197 | 347.6 | 158.2 | 189.3 |
| Lukang | 7619 | 266.0 | 94.8 | 171.2 |
| Hemei | 6812 | 192.0 | 123.4 | 68.6 |
| Beidou | 3272 | 87.7 | 26.1 | 61.6 |
| Yuanlin | 10537 | 455.3 | 225.3 | 230.0 |
| Xihu | 4971 | 655.5 | 335.7 | 319.8 |
| Tianzhong | 4928 | 128.8 | 34.0 | 94.8 |
| Erlin | 6616 | 695.7 | 228.4 | 467.3 |
| Xianxi | 1513 | 125.3 | 36.0 | 89.3 |
| Shengang | 2995 | 113.0 | 42.1 | 70.9 |
| Fuxing | 4584 | 182.3 | 40.8 | 141.5 |
| Xiushui | 3314 | 311.0 | 127.5 | 183.5 |
| Huatan | 3854 | 66.2 | 23.2 | 43.0 |
| Fenyuan | 2906 | 159.3 | 46.6 | 112.7 |
| Dacun | 3169 | 102.5 | 48.6 | 53.9 |
| Puyan | 4062 | 288.2 | 136.5 | 151.7 |
| Puxin | 3161 | 247.3 | 101.7 | 145.6 |
| Yongjing | 3723 | 229.9 | 77.8 | 152.1 |
| Shetou | 4248 | 93.9 | 29.0 | 64.9 |
| Ershui | 2414 | 61.9 | 35.9 | 26.0 |
| Tianwei | 3077 | 201.1 | 92.2 | 108.9 |
| Pitou | 3689 | 404.8 | 165.1 | 239.7 |
| Fangyuan | 5250 | 447.9 | 262.3 | 185.6 |
| Dacheng | 3058 | 471.9 | 203.0 | 268.9 |
| Zhutang | 2369 | 266.9 | 107.8 | 159.1 |
| Xizhou | 4011 | 312.1 | 81.6 | 230.5 |
| **Overall** | 126349 | 6913.8 | 2883.4 | 4030.4 |
